# Supplementary material for: Elastic Energy Storage and Radial Forces in the Myofilament Lattice Depend on Sarcomere Length
Source: PLOS journal article supplement (doi:10.1371/journal.pcbi.1002770), 2012-11-15
Supplement: S4 (10.1371/journal.pcbi.1002770.s004) [file journal.pcbi.1002770.s004]

**Table S1 - Geometric and mechanical properties**

| <b>Filament half</b> | <b>Parameter</b>          | <b>Value</b> | <b>Source</b> |
|----------------------|---------------------------|--------------|---------------|
| Thick filament       | Rest length               | 858 nm       | [1]           |
|                      | Undecorated region length | 80 nm        | [2]           |
|                      | Inter-crown spacing       | 14.3 nm      | [1]           |
|                      | Number of crowns          | 60 /filament | [1]           |
|                      | Compliance                | 2020 pN/nm   | [3]           |
| Thin filament        | Rest length               | 1119 nm      | [1]           |
|                      | Binding-site spacing      | 12.4 nm      | [1]           |
|                      | Rotation between sites    | 240°         | [1]           |
|                      | Compliance                | 1743 pN/nm   | [3]           |

A listing of the geometric and mechanical parameters used in the model. Where possible, values used are common to a wide array of striated muscle. By choosing conserved values, a more general model is produced and the necessity of computationally intractable sensitivity analyses is avoided. All values are given for the half-sarcomere model and thus refer to one half of a thick or a thin filament.

Sources are as follows:

1. Tanner BCW, Daniel TL, Regnier M (2007) Sarcomere lattice geometry influences cooperative myosin binding in muscle. PLoS Comput Biol 3: e115.
2. Higuchi H, Yanagida T, Goldman YE (1995) Compliance of thin filaments in skinned fibers of rabbit skeletal muscle. Biophys J 69: 1000–10
3. Daniel TL, Trimble AC, Chase PB (1998) Compliant realignment of binding sites in muscle: transient behavior and mechanical tuning. Biophys J 74: 1611–21.
